# Supplementary material
Source: PubMed Central journal article supplement (PMC8849831)
Supplement: mmc1.pdf [file mmc1.pdf]

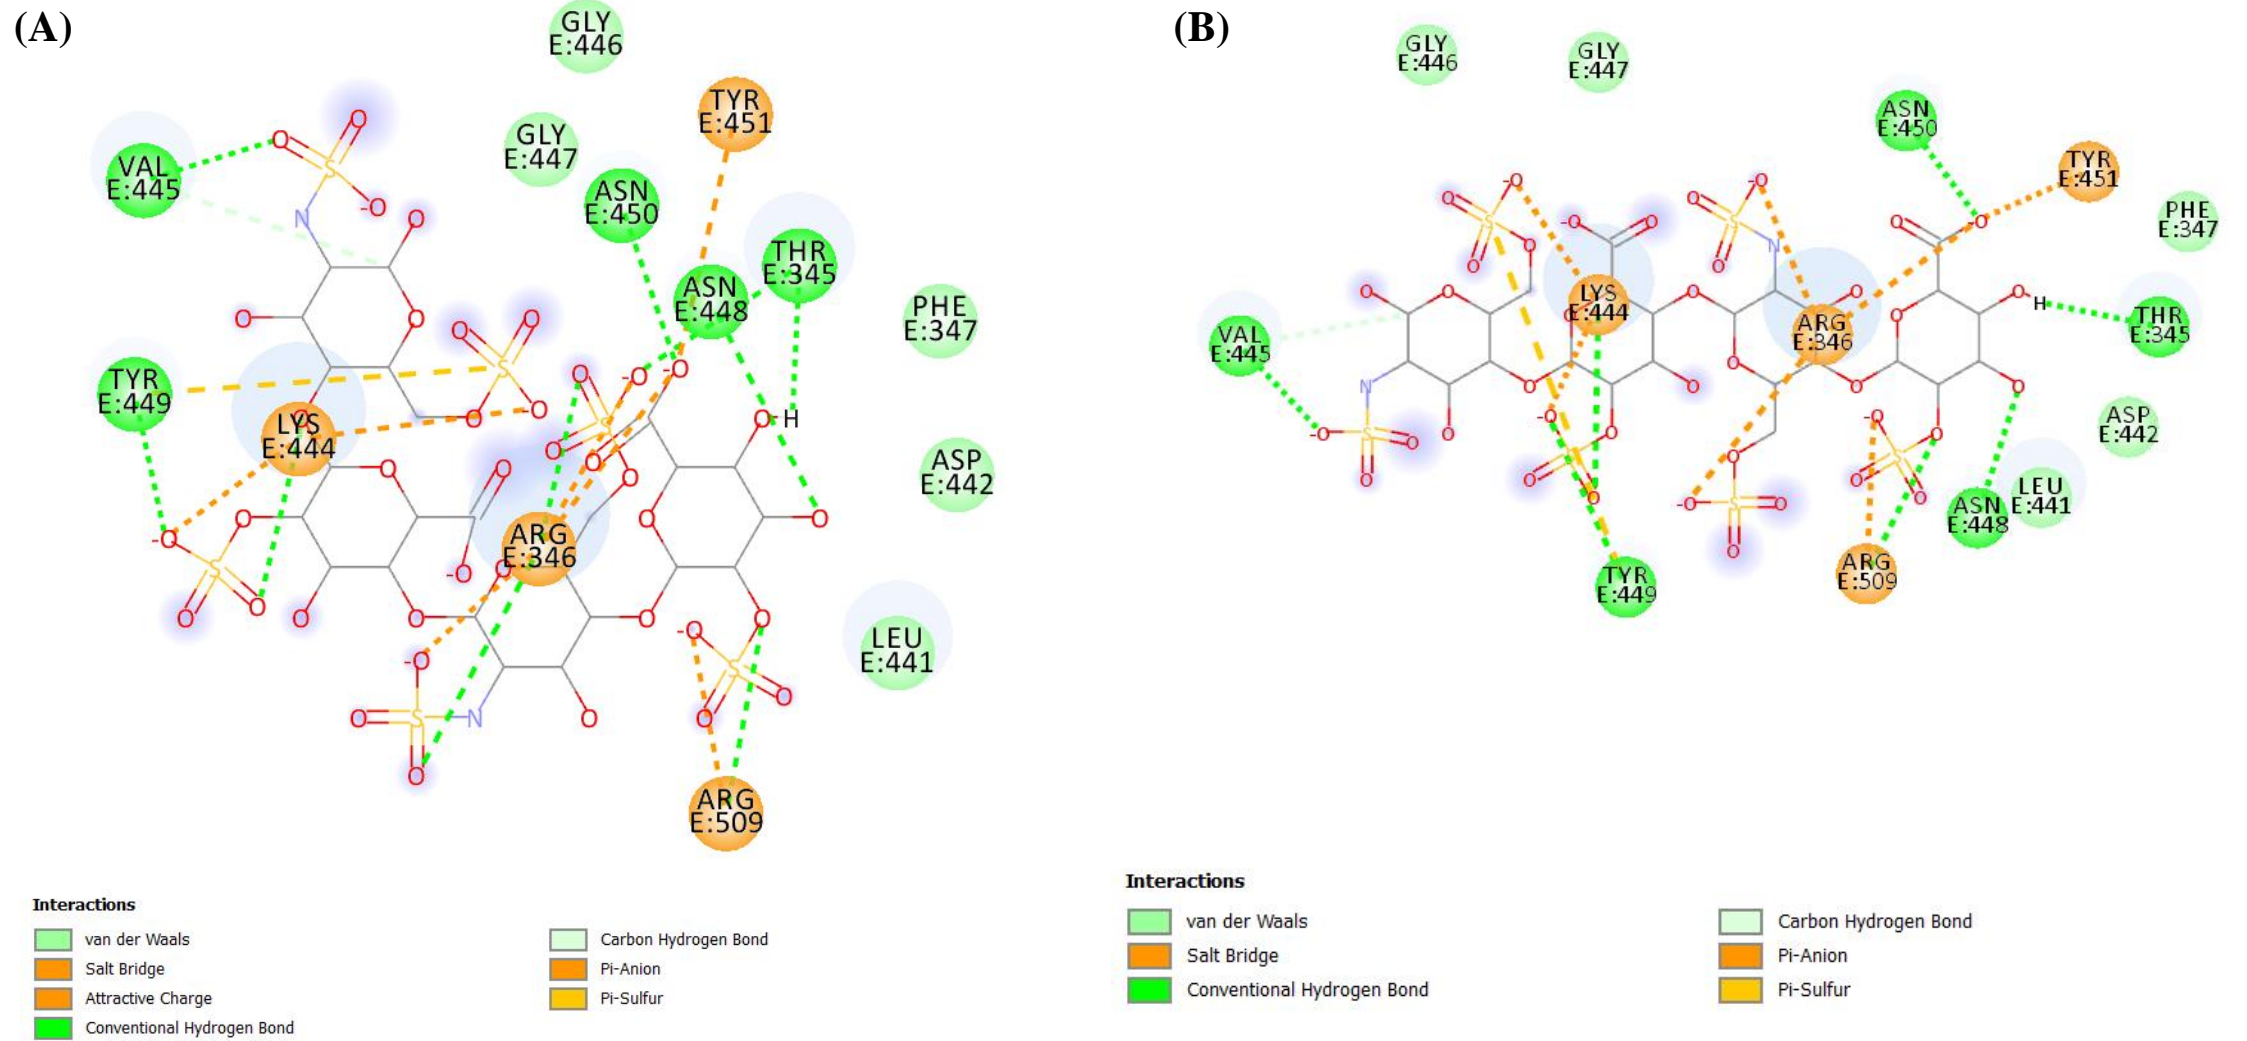

**Supporting Information Figure S1.** Molecular docking interactions of heparin to SARS-CoV-2 spike RBD mutants. The docked structures of Heparin-mutant RBD complexes were obtained from cluster 0 provided by Cluspro webserver. Two-dimensional (2D) diagrams of heparin-RBD interactions for (A) K417N, and (B) K417T. The protein residues and interactions are colored accordingly and provided in figure.

**(A)**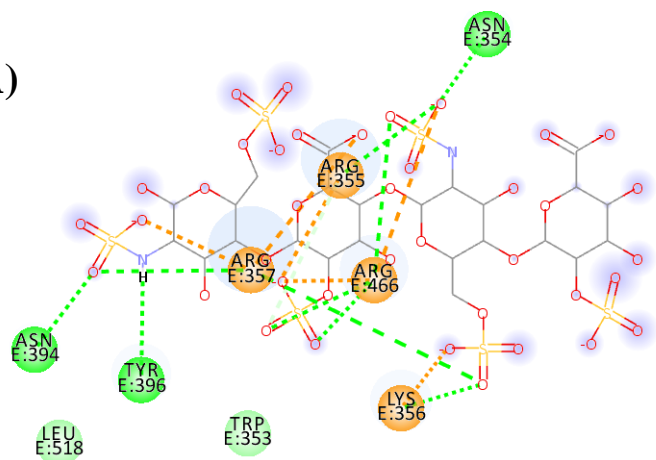**Interactions**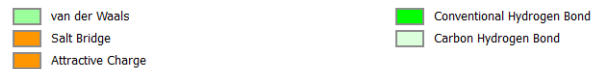**(B)**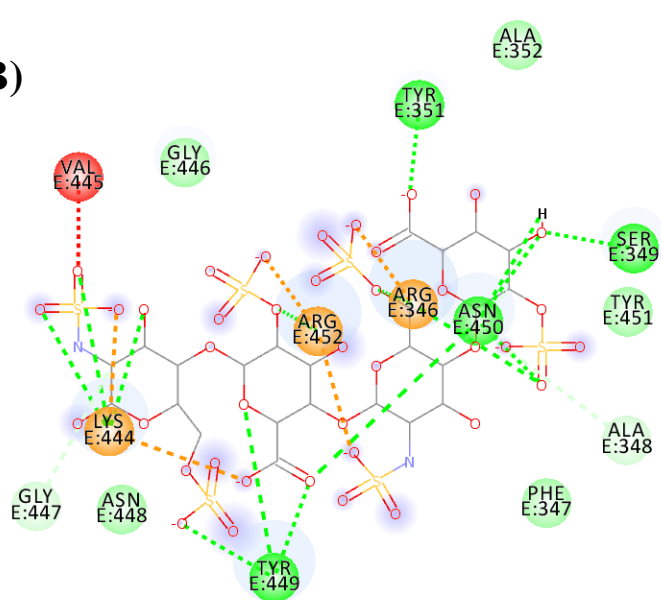**Interactions**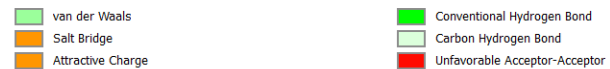**(C)**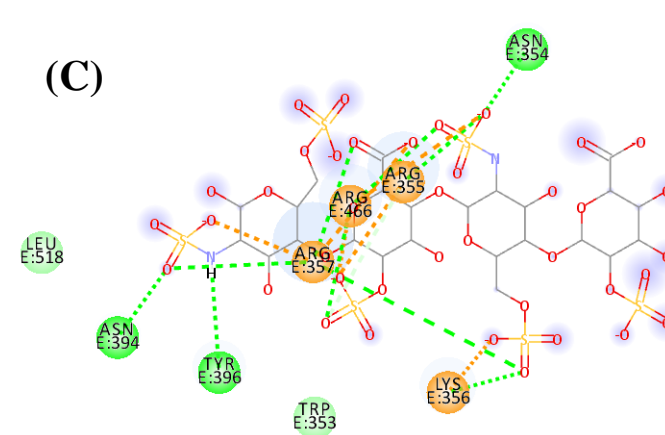**Interactions**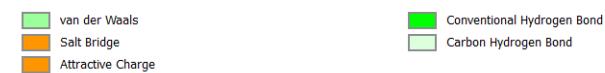**(D)**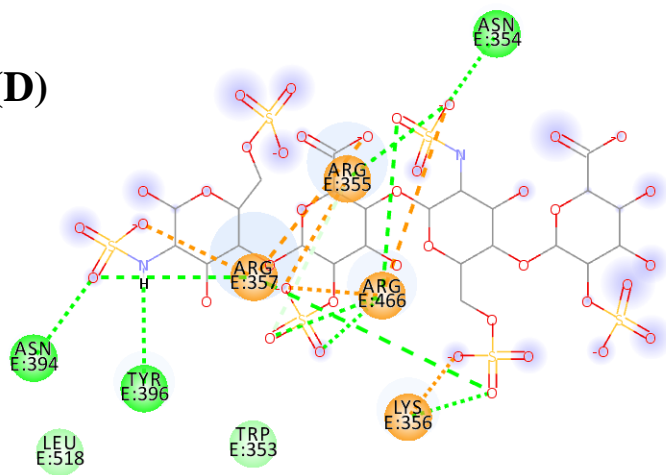**Interactions**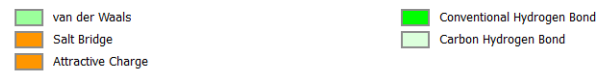**(E)**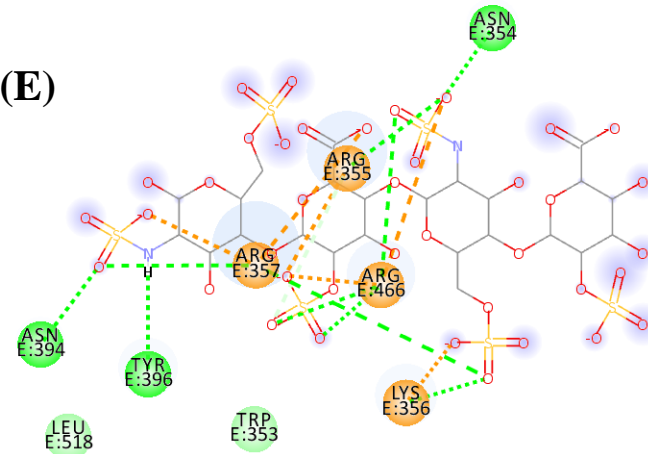**Interactions**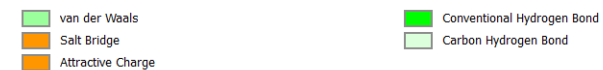

**(A)**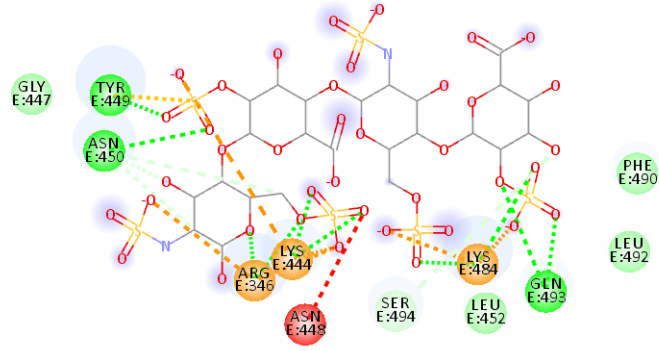**Interactions**

- van der Waals
- Salt Bridge
- Attractive Charge
- Conventional Hydrogen Bond
- Carbon Hydrogen Bond
- Unfavorable Acceptor-Acceptor
- Pi-Sulfur

**(C)**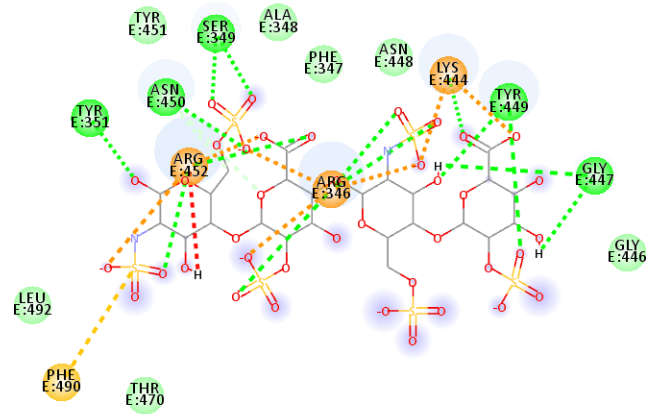**Interactions**

- van der Waals
- Salt Bridge
- Attractive Charge
- Conventional Hydrogen Bond
- Carbon Hydrogen Bond
- Unfavorable Donor-Donor
- Pi-Sulfur

**(B)**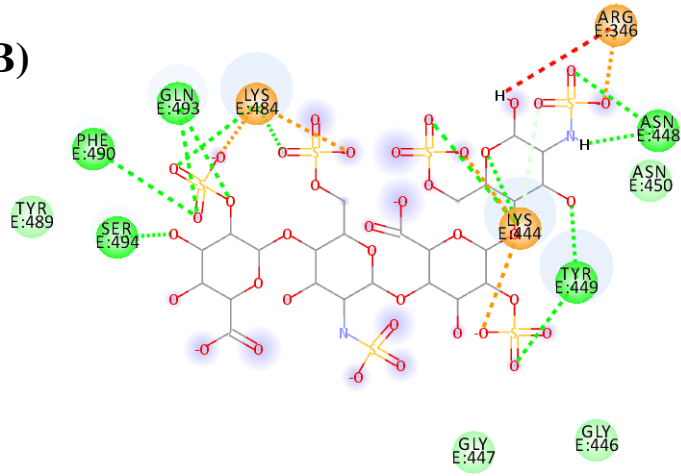**Interactions**

- van der Waals
- Salt Bridge
- Conventional Hydrogen Bond
- Carbon Hydrogen Bond
- Unfavorable Donor-Donor

**(D)**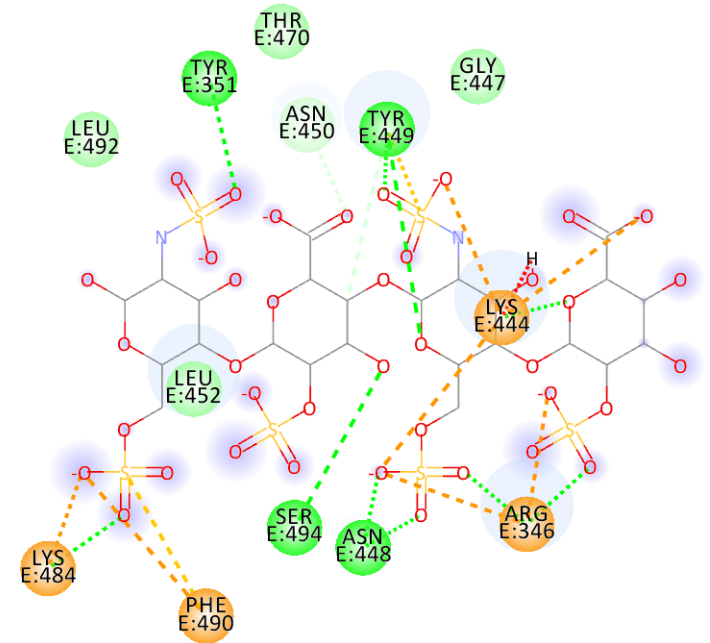**Interactions**

- van der Waals
- Salt Bridge
- Attractive Charge
- Conventional Hydrogen Bond
- Carbon Hydrogen Bond
- Unfavorable Donor-Donor
- Pi-Anion
- Pi-Sulfur

**Supporting Information Figure 2.** Molecular docking interactions of heparin to SARS-CoV-2 RBD variants. The docked structures of Heparin-mutant RBD complexes obtained from cluster 1. Two-dimensional (2D) diagrams of heparin-mutant RBD interactions for (A) N501Y, (B) L452R, (C) E484Q, (D) K417N, and (E) K417T.

**Supporting Information Figure 3.** Molecular docking interactions of heparin to SARS-CoV-2 RBD variants. The docked structures of Heparin-mutant RBD complexes obtained from cluster 1. Two-dimensional (2D) diagrams of heparin-RBD interactions for (A) K417N-E484K-N501Y, (B) K417T-E484K-N501Y N501Y, (C) L452R-E484K, and (D) E484K. The protein residues and interactions are colored accordingly and provided in figure.

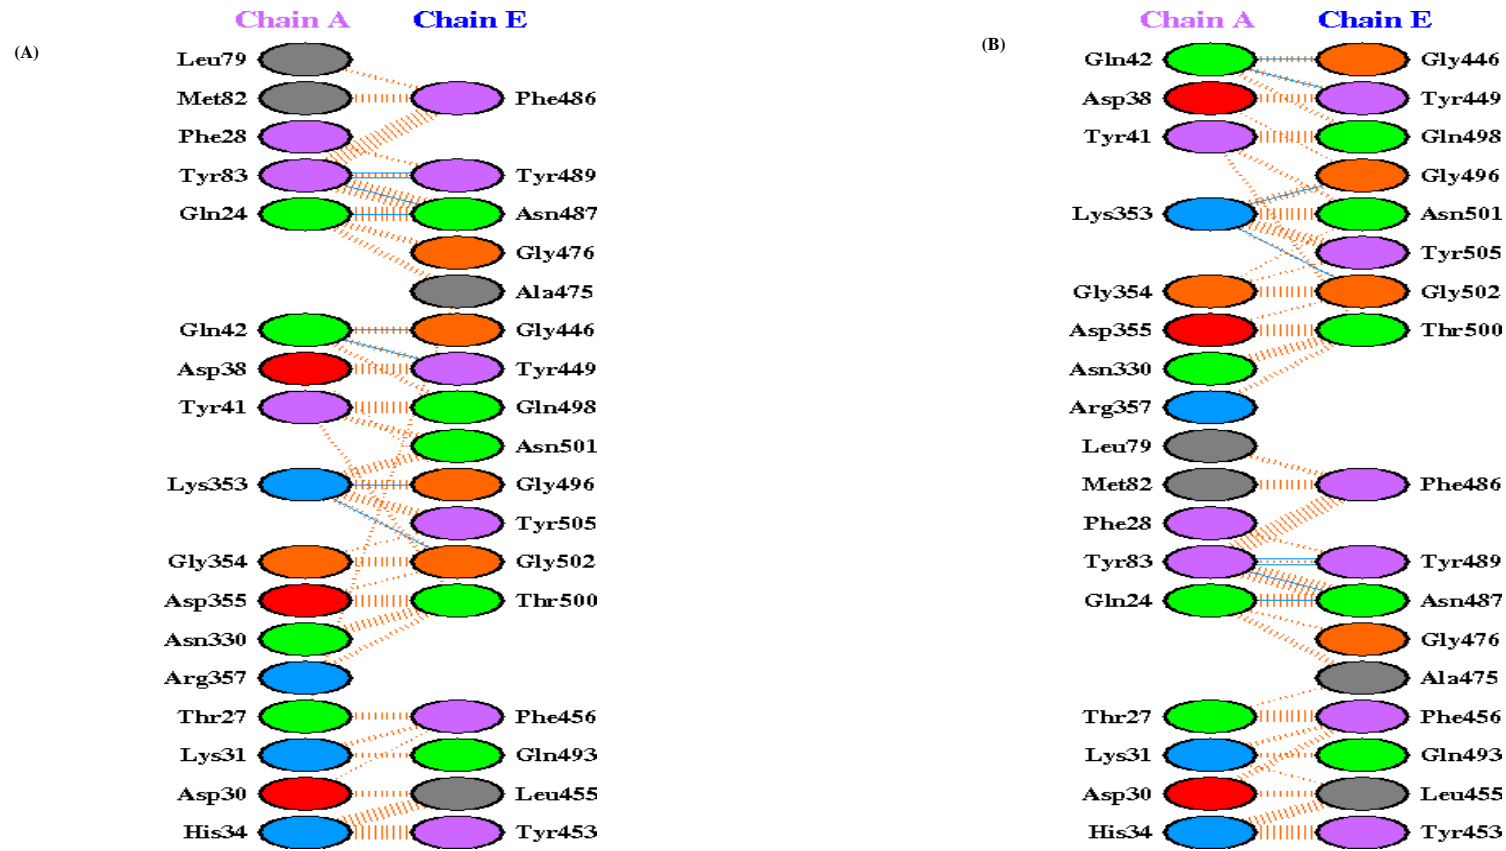

**Supporting Information Figure 4.** Molecular docking interactions of ACE2 to SARS-CoV-2 RBD variants in the presence of heparin. Two-dimensional (2D) diagrams of RBD/ACE2 interactions in the presence of heparin for (A) K417N, and (B) K417T.
